# Supplementary material
Source: PubMed Central journal article supplement (PMC4746690)
Supplement: supp_tpc.15.01002_TPC2015-01002-RAR1_Supplemental_Data.pdf [file supp_tpc.15.01002_TPC2015-01002-RAR1_Supplemental_Data.pdf]

## Supplemental Figure 1

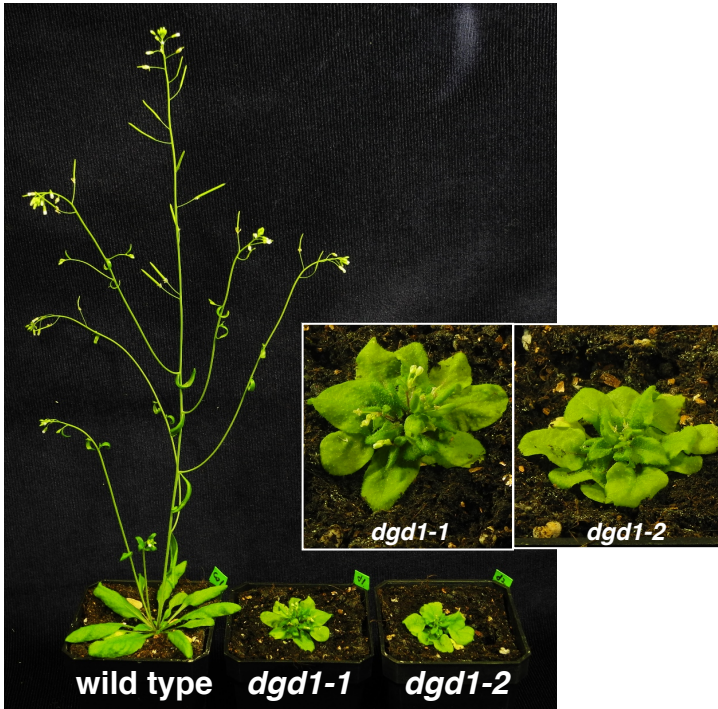

**Supplemental Figure 1.** Visible phenotypes of the two *dgd1* mutant alleles. Plants were grown for 35 days on a 16 h light/8 h dark cycle. The inserts show close-up views of the two *dgd1* mutants.

## Supplemental Figure 2

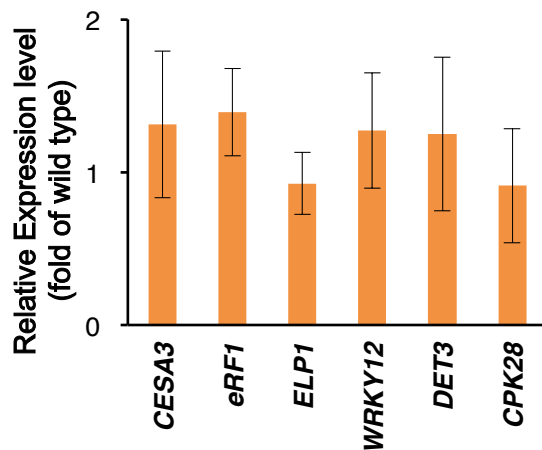

**Supplemental Figure 2.** Level of expression of genes, mutations of which result in ectopic lignification. Wild-type and *dgd1-1* mutant plants were grown for 10 days on MS plates, then were harvested for total RNA isolation. Gene expression levels were analyzed by quantitative RT-PCR and normalized to *UBQ10* gene expression in the same sample, then expression in the *dgd1-1* mutant was expressed as a fold value compared to the wild type. Values are means  $\pm$  SD of four independent plant batches.

## Supplemental Figure 3

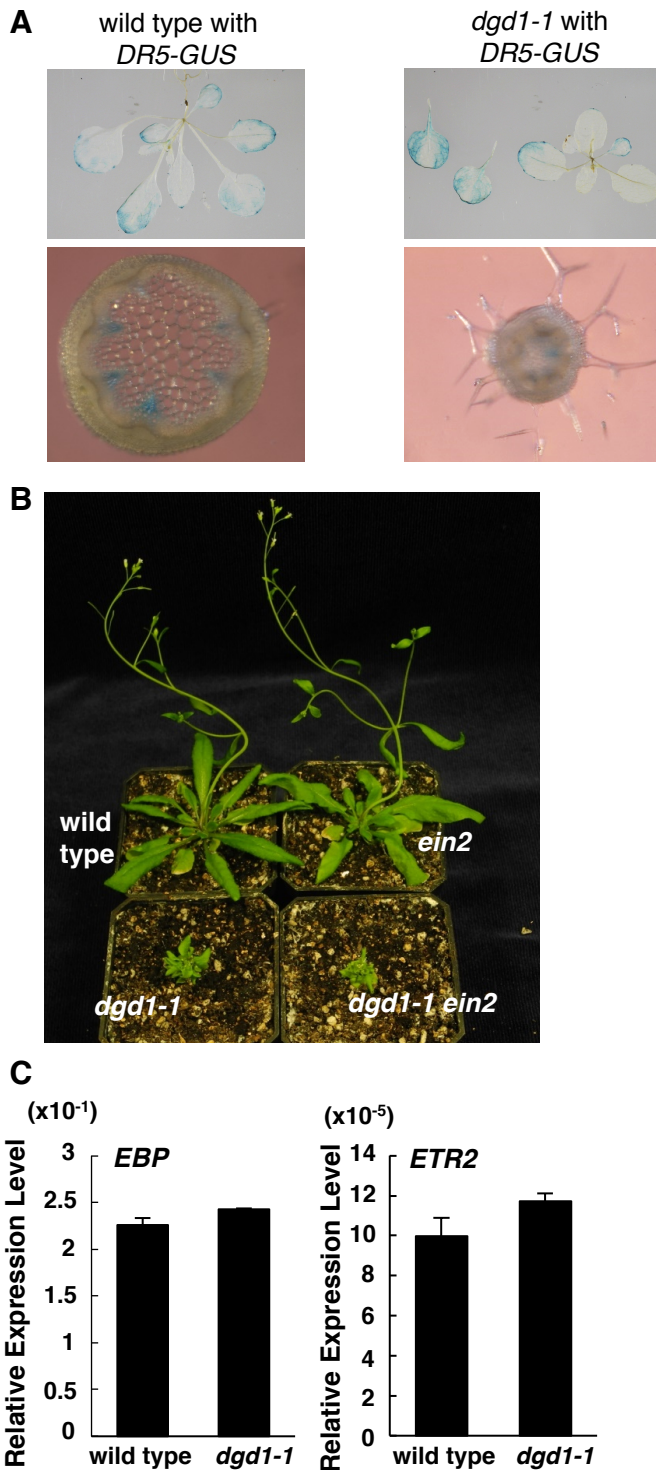

**Supplemental Figure 3.** The *dgd1* phenotypes are not caused by activation of auxin or ethylene signaling. **(A)** GUS staining of wild-type and *dgd1-1* plants containing the auxin-responsive *DR5-GUS* reporter transgene. The whole seedlings (top panels) and cross-sections of inflorescence stems (bottom panels) were from 17- or 35-day-old plants, respectively. **(B)** Visible phenotypes of 39-day-old wild-type, *ein2* single mutant, *dgd1-1* single mutant and *dgd1-1 ein2* double mutant plants. **(C)** Expression of ethylene-responsive genes. Plants were grown for 10 days on MS plates, then expression of the ethylene-responsive genes *EBP* and *ETR2* was analyzed by quantitative RT-PCR and expressed relative to *UBQ10* gene expression. Values are means  $\pm$  SD of three technical replicates.

**Supplemental Table 1.** Lipid composition of the wild-type and various mutant plants. Plants were grown on a 16 h light/8 h dark cycle for 10 days on MS plates, then were moved to soil for another 10 days. The means  $\pm$  SEM for at least three independent plant batches are shown. Values are relative peak area (%). MGDG, monogalactosyldiacylglycerol; DGDG, digalactosyldiacylglycerol; PG, phosphatidylglycerol; PC, phosphatidylcholine; PE, phosphatidylethanolamine; PS, phosphatidylserine; PI, phosphatidylinositol; SQDG, sulphoquinovosyldiacylglycerol; L-MGDG, Lyso-MGDG; L-DGDG, Lyso-DGDG; L-PG, Lyso-PG; L-PC, Lyso-PC; L-PE, Lyso-PE; L-PI, Lyso-PI; DAG, diacylglycerol; TAG, triacylglycerol.

|        | wild<br>type      | <i>dgd1-1</i>     | <i>dgd1-2</i>     | <i>coi1-30</i>    | <i>coi1-30</i><br><i>dgd1-1</i> | <i>aos</i>        | <i>aos</i><br><i>dgd1-1</i> | <i>aos</i><br><i>dgd1-2</i> |
|--------|-------------------|-------------------|-------------------|-------------------|---------------------------------|-------------------|-----------------------------|-----------------------------|
| MGDG   | 33.5 $\pm$ 8.3    | 28.4 $\pm$ 3.8    | 24.0 $\pm$ 3.4    | 30.6 $\pm$ 5.6    | 31.0 $\pm$ 5.4                  | 30.5 $\pm$ 8.9    | 29.1 $\pm$ 3.5              | 31.9 $\pm$ 4.3              |
| DGDG   | 6.2 $\pm$ 1.4     | 0.5 $\pm$ 0.2     | 0.4 $\pm$ 0.04    | 6.1 $\pm$ 1.0     | 0.6 $\pm$ 0.1                   | 5.8 $\pm$ 1.2     | 0.5 $\pm$ 0.1               | 0.5 $\pm$ 0.2               |
| PG     | 27.2 $\pm$ 4.7    | 33.5 $\pm$ 2.3    | 36.6 $\pm$ 2.4    | 28.5 $\pm$ 3.2    | 31.6 $\pm$ 1.2                  | 28.7 $\pm$ 4.0    | 30.5 $\pm$ 0.5              | 31.8 $\pm$ 2.3              |
| PC     | 11.2 $\pm$ 3.8    | 9.0 $\pm$ 6.3     | 13.9 $\pm$ 1.3    | 12.8 $\pm$ 3.8    | 13.3 $\pm$ 4.2                  | 12.8 $\pm$ 4.4    | 14.8 $\pm$ 3.0              | 12.2 $\pm$ 4.3              |
| PE     | 16.6 $\pm$ 1.8    | 22.2 $\pm$ 3.8    | 19.2 $\pm$ 5.4    | 16.6 $\pm$ 1.1    | 18.6 $\pm$ 1.5                  | 17.2 $\pm$ 1.3    | 19.5 $\pm$ 0.6              | 18.2 $\pm$ 1.0              |
| PS     | 0.11 $\pm$ 0.01   | 0.12 $\pm$ 0.03   | 0.10 $\pm$ 0.03   | 0.10 $\pm$ 0.03   | 0.10 $\pm$ 0.02                 | 0.13 $\pm$ 0.05   | 0.12 $\pm$ 0.03             | 0.12 $\pm$ 0.04             |
| PI     | 0.33 $\pm$ 0.02   | 0.39 $\pm$ 0.05   | 0.29 $\pm$ 0.10   | 0.26 $\pm$ 0.10   | 0.29 $\pm$ 0.05                 | 0.24 $\pm$ 0.11   | 0.22 $\pm$ 0.09             | 0.29 $\pm$ 0.03             |
| SQDG   | 2.4 $\pm$ 0.6     | 3.0 $\pm$ 0.6     | 3.1 $\pm$ 0.4     | 2.6 $\pm$ 0.8     | 2.2 $\pm$ 1.2                   | 2.5 $\pm$ 0.7     | 3.2 $\pm$ 0.5               | 2.8 $\pm$ 1.0               |
| L-MGDG | 0.14 $\pm$ 0.11   | 0.07 $\pm$ 0.01   | 0.04 $\pm$ 0.02   | 0.10 $\pm$ 0.07   | 0.11 $\pm$ 0.08                 | 0.06 $\pm$ 0.07   | 0.07 $\pm$ 0.05             | 0.10 $\pm$ 0.09             |
| L-DGDG | 0.67 $\pm$ 0.10   | 0.99 $\pm$ 0.17   | 0.81 $\pm$ 0.14   | 0.72 $\pm$ 0.10   | 0.83 $\pm$ 0.12                 | 0.69 $\pm$ 0.09   | 0.82 $\pm$ 0.11             | 0.72 $\pm$ 0.11             |
| L-PG   | 0.05 $\pm$ 0.03   | 0.14 $\pm$ 0.13   | 0.07 $\pm$ 0.05   | 0.02 $\pm$ 0.02   | 0.07 $\pm$ 0.08                 | 0.03 $\pm$ 0.01   | 0.04 $\pm$ 0.02             | 0.07 $\pm$ 0.09             |
| L-PC   | 0.09 $\pm$ 0.03   | 0.11 $\pm$ 0.01   | 0.09 $\pm$ 0.02   | 0.06 $\pm$ 0.02   | 0.09 $\pm$ 0.02                 | 0.07 $\pm$ 0.01   | 0.08 $\pm$ 0.01             | 0.08 $\pm$ 0.02             |
| L-PE   | 0.08 $\pm$ 0.03   | 0.09 $\pm$ 0.00   | 0.07 $\pm$ 0.01   | 0.05 $\pm$ 0.02   | 0.07 $\pm$ 0.02                 | 0.06 $\pm$ 0.01   | 0.06 $\pm$ 0.01             | 0.06 $\pm$ 0.02             |
| L-PI   | 0.005 $\pm$ 0.001 | 0.006 $\pm$ 0.003 | 0.005 $\pm$ 0.001 | 0.003 $\pm$ 0.001 | 0.005 $\pm$ 0.001               | 0.005 $\pm$ 0.001 | 0.004 $\pm$ 0.000           | 0.004 $\pm$ 0.002           |
| DAG    | 0.49 $\pm$ 0.15   | 0.62 $\pm$ 0.14   | 0.58 $\pm$ 0.19   | 0.55 $\pm$ 0.18   | 0.77 $\pm$ 0.07                 | 0.46 $\pm$ 0.24   | 0.48 $\pm$ 0.23             | 0.60 $\pm$ 0.28             |
| TAG    | 0.87 $\pm$ 0.21   | 0.60 $\pm$ 0.12   | 0.56 $\pm$ 0.19   | 0.93 $\pm$ 0.37   | 0.42 $\pm$ 0.06                 | 0.73 $\pm$ 0.28   | 0.42 $\pm$ 0.07             | 0.60 $\pm$ 0.20             |



**Supplemental Table 2. Primers used for quantitative RT-PCR and genotyping.**

## Primers for quantitative RT-PCR

| Gene name     | ATG number | Primer sequence |                                    | Reference            |
|---------------|------------|-----------------|------------------------------------|----------------------|
| <b>UBQ10</b>  | At4g05320  | <b>Fw</b>       | TCC GGA TCA GCA GAG GCT TA         |                      |
|               |            | <b>Rv</b>       | TCA GAA CTC TCC ACC TCA AG         |                      |
| <b>VSP1</b>   | At5g24780  | <b>Fw</b>       | GGG CGT ACT GGT CGT GGT TA         |                      |
|               |            | <b>Rv</b>       | TCC CGA GTT CCA AGA GGT TTT        |                      |
| <b>PDF1.2</b> | At5g44420  | <b>Fw</b>       | TGT TCT CTT TGC TGC TTT CGA CGC    |                      |
|               |            | <b>Rv</b>       | TGT GTG CTG GGA AGA CAT AGT TGC    |                      |
| <b>LOX2</b>   | At3g45140  | <b>Fw</b>       | GCC ATT GAG TTG ACT TGT CC         | Grebner et al., 2013 |
|               |            | <b>Rv</b>       | CAC TTA GTT GTC TAT TTG CCG C      |                      |
| <b>EBP</b>    | At3g16770  | <b>Fw</b>       | CTG GGG TTT CTA TTC CAC CTC        |                      |
|               |            | <b>Rv</b>       | CCT TCT TCA CTG CCT CCT CTT        |                      |
| <b>ETR2</b>   | At3g23150  | <b>Fw</b>       | TGA TCC AAA CTC ATC TCT TTC AGA    |                      |
|               |            | <b>Rv</b>       | TTT ATA GCT AAA ACC GGA GAA ACA A  |                      |
| <b>CesA3</b>  | At5g05170  | <b>Fw</b>       | CCA GAT TGA GAG AGA TTC AGA GAG T  |                      |
|               |            | <b>Rv</b>       | AAA CGT CGG AAT AGT TCA AAT CA     |                      |
| <b>eRF1-1</b> | At5g47880  | <b>Fw</b>       | ACT GCC TTT GAT TCC GAG GA         |                      |
|               |            | <b>Rv</b>       | GCG ATG GTG AGG ATT TGA TTG        |                      |
| <b>ELP1</b>   | At1g05850  | <b>Fw</b>       | TGC CTT ACC CAT TTA CTG GAA        |                      |
|               |            | <b>Rv</b>       | GGG TGG TTC AAG AGA TCA GC         |                      |
| <b>WRKY12</b> | At2g44745  | <b>Fw</b>       | GGT GGT TAA TGA TGA TCA GGA GA     |                      |
|               |            | <b>Rv</b>       | TTC CAC TAT TTG ATC TCC ACC A      |                      |
| <b>DET3</b>   | At1g12840  | <b>Fw</b>       | CGT GTC GCA GAT AAT TTC AGG        |                      |
|               |            | <b>Rv</b>       | CAC TTT GTT CAA AAT CAC GGA CT     |                      |
| <b>CPK28</b>  | At5g66210  | <b>Fw</b>       | TTG AGG ATG ACG ATT ACG TCT ATA TT |                      |
|               |            | <b>Rv</b>       | GGA GTA CCG ATT ACC TTT CTT GG     |                      |
| <b>LOX3</b>   | At1g17420  | <b>Fw</b>       | TCC CTG CCG ATC TAA                | Grebner et al., 2013 |
|               |            | <b>Rv</b>       | GTT TGG GAC GTA GCC A              |                      |
| <b>LOX4</b>   | At1g72520  | <b>Fw</b>       | GCT TGC TTA GAT ACG ACA CT         | Grebner et al., 2013 |
|               |            | <b>Rv</b>       | ATG TGG TCT TCC GTG AGA GC         |                      |
| <b>LOX6</b>   | AT1g67560  | <b>Fw</b>       | CGA AGA TTC CAC TGA CAC CA         |                      |
|               |            | <b>Rv</b>       | TCG GAA GGT AGG CAT GGT T          |                      |
| <b>AOC1</b>   | AT3g25760  | <b>Fw</b>       | AACTCCGGTACCACCGTCTA               |                      |
|               |            | <b>Rv</b>       | GGCTTAAGCGCCTTAGCTTC               |                      |
| <b>AOC2</b>   | AT3g25770  | <b>Fw</b>       | AATTAGATCGACACAGCCCCAAG            | Stenzel et al., 2012 |
|               |            | <b>Rv</b>       | CCGAGACCGAACATTAAGCTGA             |                      |
| <b>AOC3</b>   | AT3g25770  | <b>Fw</b>       | CGAAGGAGATAGAAACAGTCCAGC           | Stenzel et al., 2012 |
|               |            | <b>Rv</b>       | GGAGTTCACGCGCTTAAATCC              |                      |

| Gene name      | ATG number | Primer sequence |                              | Reference            |
|----------------|------------|-----------------|------------------------------|----------------------|
| <b>AOC4</b>    | AT1g13280  | <b>Fw</b>       | GCCGTTCTCGTAAGCGTAATGT       | Stenzel et al., 2012 |
|                |            | <b>Rv</b>       | GGAGTTCACGCGCTTAAATCC        |                      |
| <b>AOS</b>     | AT5g42650  | <b>Fw</b>       | CACCGGCGTTAGTCAAATCT         |                      |
|                |            | <b>Rv</b>       | CCGGCGGATTCTAAGAAAA          |                      |
| <b>PLA-Ia2</b> | At2g31690  | <b>Fw</b>       | TGAGGACAGTGACAATGTTGCATTA    |                      |
|                |            | <b>Rv</b>       | CACGGCATTGGACCAATACATC       |                      |
| <b>PLA-Iβ2</b> | At4g16820  | <b>Fw</b>       | GTAATAACGGGAGAAGTCC          | Seo et al., 2009     |
|                |            | <b>Rv</b>       | CCGTCGACTAAGTGCAAG           |                      |
| <b>PLA-Iγ1</b> | At1g06800  | <b>Fw</b>       | GCGAGTTGGGAACATTCTG          |                      |
|                |            | <b>Rv</b>       | CTCAACACCTTCACTCCCAAT        |                      |
| <b>PLA-Iγ2</b> | At2g30550  | <b>Fw</b>       | CGAGAGTTGGGAACGTTAGG         | Seo et al., 2009     |
|                |            | <b>Rv</b>       | CTCTCATCACTTTCCTCCCAAT       |                      |
| <b>PLA-Iγ3</b> | At1g51440  | <b>Fw</b>       | GTTTCAGTTTCAGAAGTATGTG       | Seo et al., 2009     |
|                |            | <b>Rv</b>       | CTCTTCTCTGCTTCTTCGTC         |                      |
| <b>DGL</b>     | AT1g05800  | <b>Fw</b>       | GGCGGTTAATGAAGACAATTTTGGCGGC |                      |
|                |            | <b>Rv</b>       | ATGCCGCATTGGTCGCTGCGTTTGTAAA |                      |
| <b>DAD1</b>    | AT2g44810  | <b>Fw</b>       | GATAACGTTAAGATGACAGCG        | Seo et al., 2009     |
|                |            | <b>Rv</b>       | GTGGCCACATTGATGCTG           |                      |

### Primers for genotyping

| Mutant name    | Mutant line number | Primer sequence |                                 |
|----------------|--------------------|-----------------|---------------------------------|
| <b>coi1-30</b> | SALK_035548        | <b>LP</b>       | TGG ACC ATA TAA ATT CAT GCA GTC |
|                |                    | <b>RP</b>       | CTG CAG TGT GTA ACG ATG CTC     |
| <b>dgd1-2</b>  | SAIL_851_G12       | <b>LP</b>       | CAT TAT GAT GGT GGG TTT TGG     |
|                |                    | <b>RP</b>       | TCG CTT TTG TGT TTA GCC ATC     |

### Supplemental References

- Grebner, W., Stengl, N.E., Oenel, A., Mueller, M.J., and Berger, S. (2013). Lipoxygenase6-dependent oxylipin synthesis in roots is required for abiotic and biotic stress resistance of Arabidopsis. *Plant Physiol* 161, 2159-2170.
- Seo, Y.S., Kim, E.Y., Kim, J.H., and Kim, W.T. (2009). Enzymatic characterization of class I DAD1-like acylhydrolase members targeted to chloroplast in Arabidopsis. *FEBS Lett* 583, 2301-2307.
- Stenzel, I., Otto, M., Delker, C., Kirmse, N., Schmidt, D., Miersch, O., Hause, B., and Wasternack, C. (2012). ALLENE OXIDE CYCLASE (AOC) gene family members of Arabidopsis thaliana: tissue- and organ-specific promoter activities and in vivo heteromerization. *J Exp Bot* 63, 6125-6138.
